# Supplementary material for: SLPI - a Biomarker of Acute Kidney Injury after Open and Endovascular Thoracoabdominal Aortic Aneurysm (TAAA) Repair
Source: PubMed Central journal article supplement (PMC7044192; doi:10.1038/s41598-020-60482-9), 2020-02-26

# SLPI - a Biomarker of Acute Kidney Injury after Open and Endovascular Thoracoabdominal Aneurysm (TAAA) Repair

Luisa Averdunk<sup>1</sup>, Marcia V. Rückbeil<sup>2</sup>, Alexander Zarbock<sup>3</sup>, Lukas Martin<sup>1</sup>, Gernot Marx<sup>1</sup>, Houman Jalaie<sup>4</sup>, Michael J. Jacobs<sup>4</sup>, Christian Stoppe<sup>1\*</sup>, Alexander Gombert<sup>4\*</sup>

## Supplemental Figures

**Figure S1:** Boxplots illustrating the SLPI-levels at each time point in patients with and without a sepsis. There were no statistically significant differences at any time point.

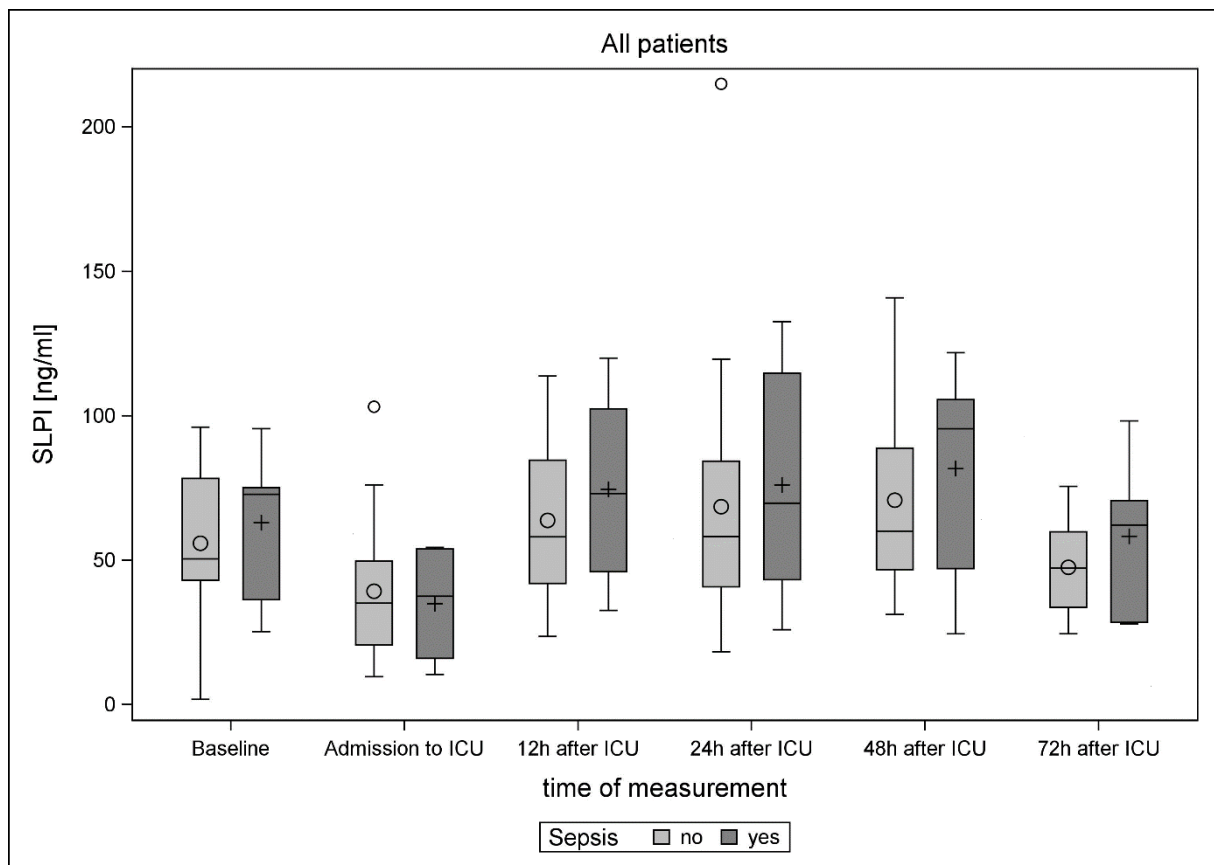

**Figure S2:** Boxplots illustrating the SLPI-levels at each time point separated by whether the patient died in-hospital. There were no statistically significant differences at any time point.

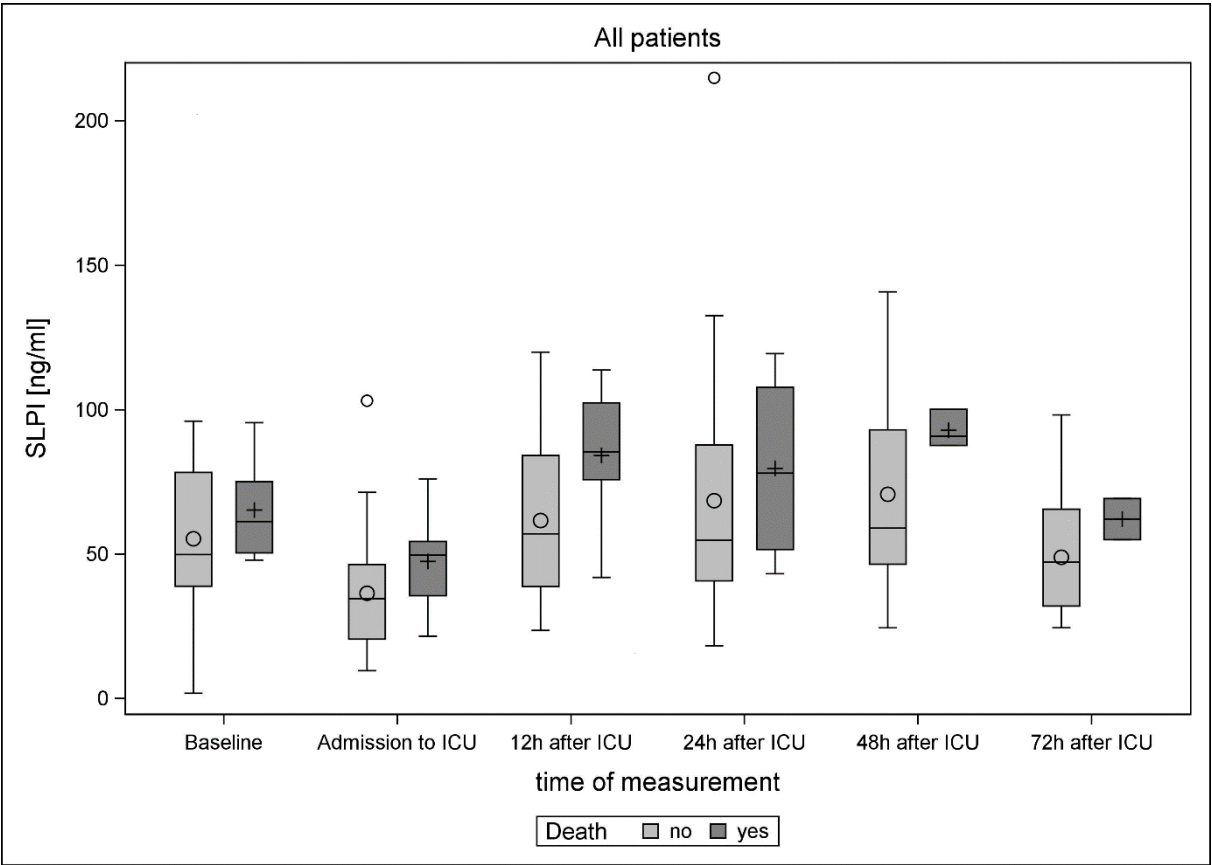

**Figure S3:** Boxplots illustrating the SLPI-levels at each time point in patients with and without a major adverse cardiovascular event (MACE). MACE was defined as myocardial infarction, acute heart failure or ventricular tachycardia. There were no statistically significant differences at any time point.

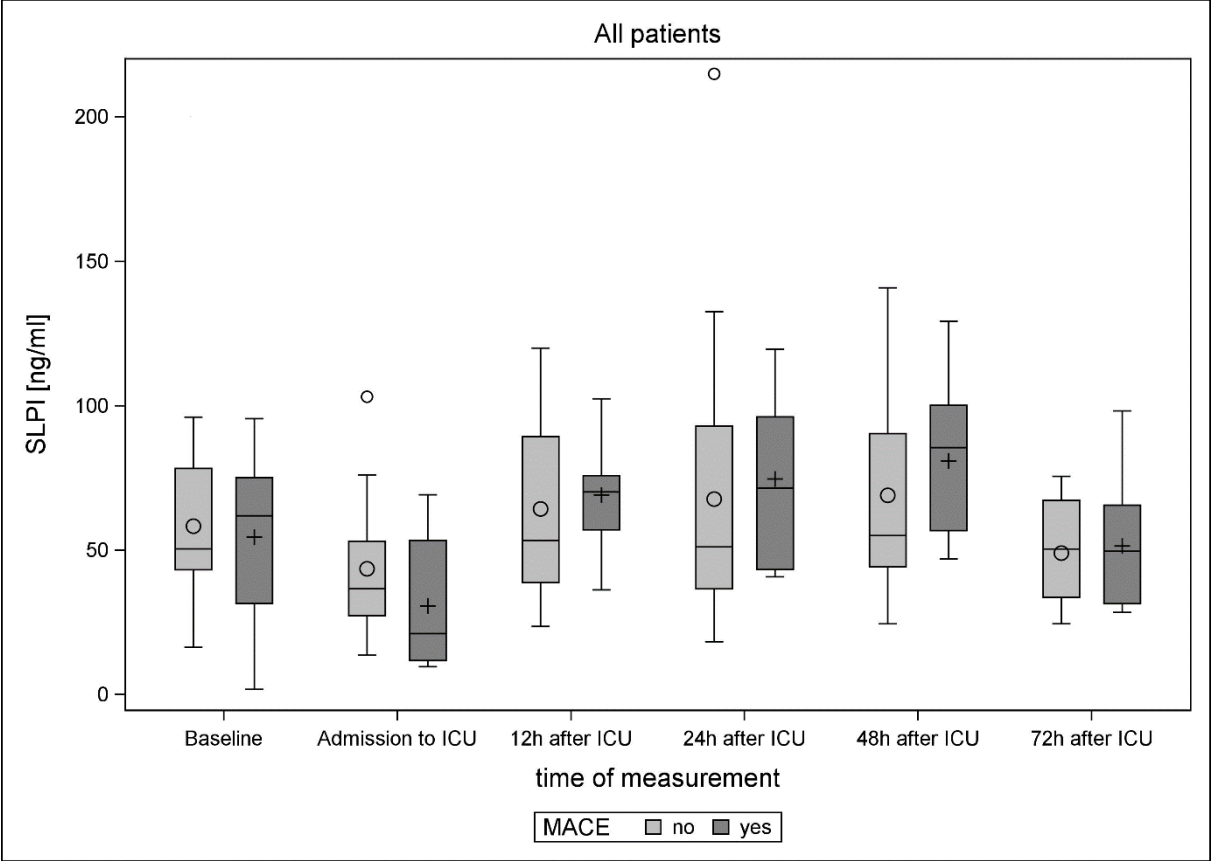

**Figure S4:** Boxplots illustrating the SLPI-levels at each time point in the group of patients with and without a pneumonia. There were no statistically significant differences at any time point.

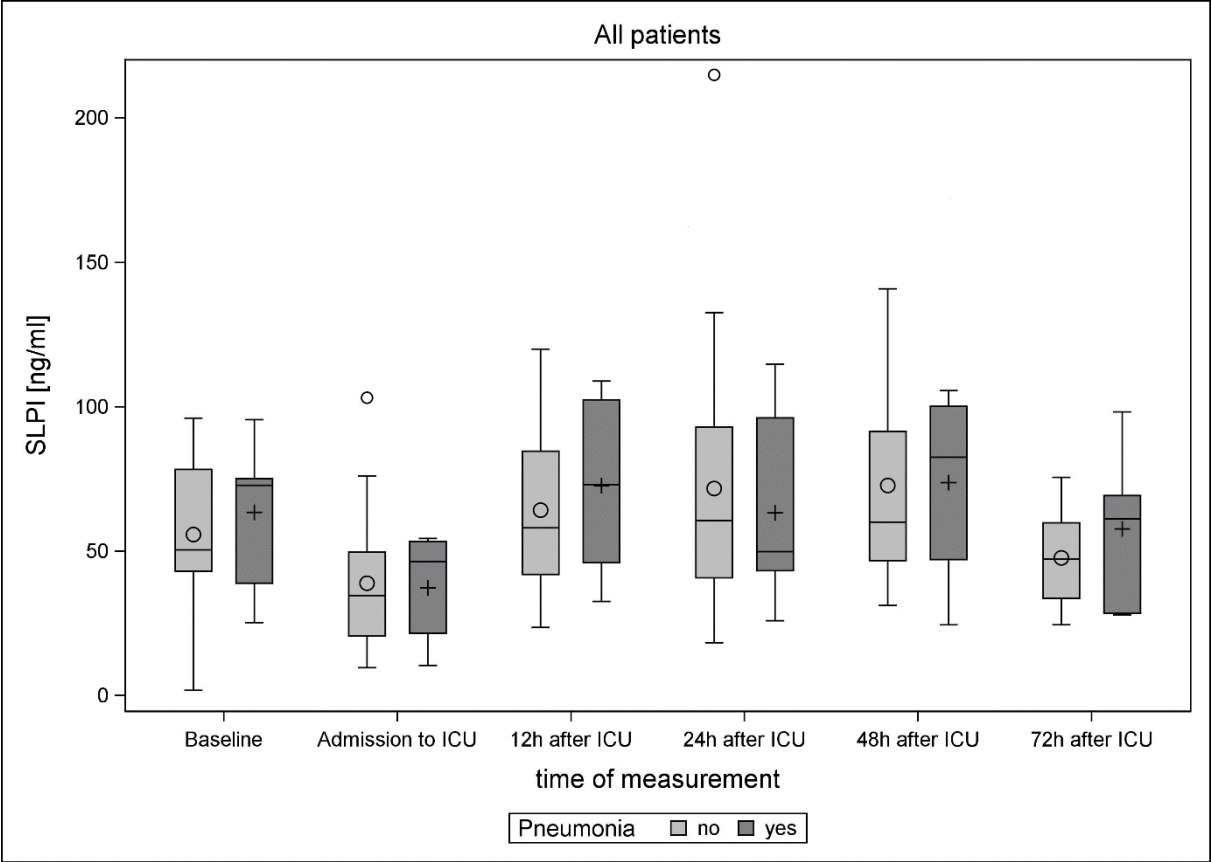

**Figure S5.** Correlation of SLPI with the inflammatory markers procalcitonin (PCT), CRP, IL-6, and white blood cells. Serum SLPI was significantly correlated with PCT 24 and 72 hours after surgery, but did not show a significant correlation with the markers CRP, IL-6 and white blood cells. CRP, C-reactive protein; PCT, procalcitonin;  $R^2$ = coefficient of determination.

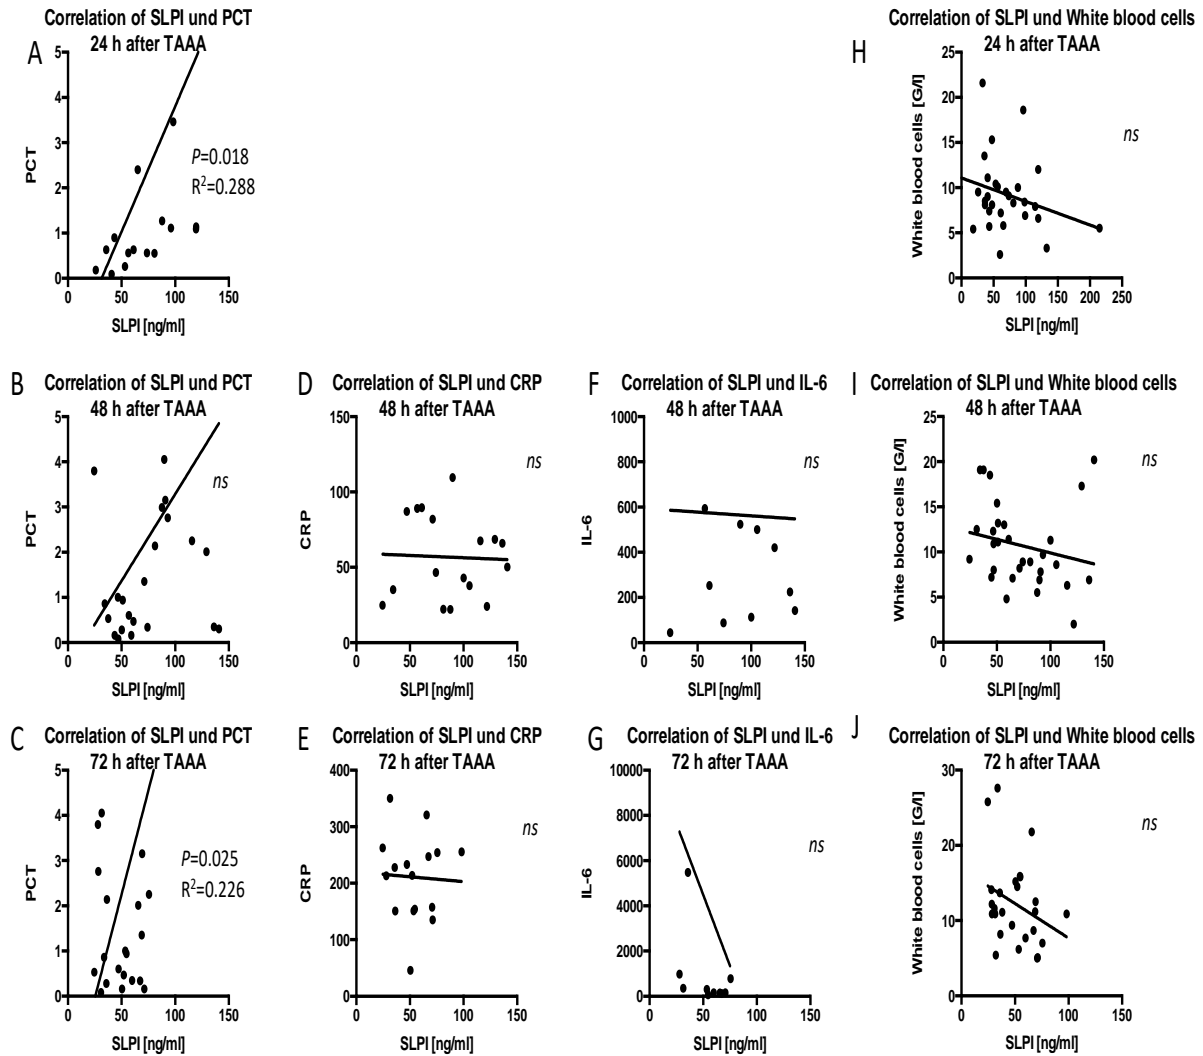

Supplement: 41598_2020_60482_MOESM1_ESM.pdf [file 41598_2020_60482_MOESM1_ESM.pdf]
